# Supplementary material for: Tai Chi for Improving Chronic Primary Musculoskeletal Pain: Protocol for a Systematic Review
Source: Evid Based Complement Alternat Med. 2021 Jun 21;2021:9932336. doi: 10.1155/2021/9932336 (PMC8238584; doi:10.1155/2021/9932336)
Supplement: Supplementary Materials — S1: PRISMA 2009 checklist. S2: Text. 1: example search strategy (PubMed). [file 9932336.f1.zip]

Archive with 2 entries (2 files):
- 9932336.f1/S1 (PRISMA 2009 checklist).doc
- 9932336.f1/S2 Text.1 Example Search Strategy (Pubmed).docx
